# Supplementary material for: Mutations in the BCR-ABL1 kinase domain in patients with chronic myeloid leukaemia treated with TKIs or at diagnosis
Source: PubMed Central journal article supplement — Oncol Lett. 2020 May 20;20(2):1071–6. doi: 10.3892/ol.2020.11650 (PMC7377099; doi:10.3892/ol.2020.11650), 2020-05-20
Supplement: Supplementary_Data.pdf [file Supplementary_Data.pdf]

Table SI. TKI treatment and other information of patients with chronic myeloid leukaemia.

| Patient no. | Sex | Age, years | Stage | Transcript type | TKI   | Mutation | Additional chromosome | T315I mutation |
|-------------|-----|------------|-------|-----------------|-------|----------|-----------------------|----------------|
| 1           | M   | 43         | CP    | P210            | Gen 1 | N        | Y                     | N              |
| 2           | M   | 40         | CP    | P210            | Gen 1 | N        | Y                     | N              |
| 6           | M   | 45         | CP    | P210            | Gen 1 | N        | Y                     | N              |
| 8           | M   | 24         | CP    | P210            | Gen 1 | N        | Y                     | N              |
| 9           | M   | 58         | CP    | P210            | Gen 1 | N        | Y                     | N              |
| 13          | M   | 44         | CP    | P210            | Gen 1 | N        | Y                     | N              |
| 20          | M   | 18         | CP    | P210            | Gen 1 | N        | Y                     | N              |
| 23          | M   | 21         | CP    | P210            | Gen 1 | N        | Y                     | N              |
| 24          | M   | 36         | CP    | P210            | Gen 1 | N        | Y                     | N              |
| 25          | M   | 28         | CP    | P210            | Gen 1 | N        | Y                     | N              |
| 26          | M   | 14         | CP    | P210            | Gen 1 | N        | Y                     | N              |
| 28          | M   | 18         | BC    | P230            | Gen 1 | N        | Y                     | N              |
| 33          | M   | 55         | CP    | P210            | Gen 1 | N        | Y                     | N              |
| 37          | M   | 25         | CP    | P210            | Gen 1 | N        | Y                     | N              |
| 41          | M   | 66         | CP    | P210            | Gen 1 | N        | Y                     | N              |
| 43          | M   | 28         | CP    | P210            | Gen 1 | N        | Y                     | N              |
| 44          | M   | 13         | CP    | P210            | Gen 1 | N        | Y                     | N              |
| 45          | M   | 28         | CP    | P210            | Gen 2 | N        | Y                     | N              |
| 46          | M   | 59         | CP    | P210            | Gen 1 | N        | Y                     | N              |
| 50          | M   | 31         | CP    | P210            | Gen 1 | N        | Y                     | N              |
| 51          | M   | 16         | CP    | P210            | Gen 1 | N        | Y                     | N              |
| 55          | M   | 28         | CP    | P210            | Gen 1 | N        | Y                     | N              |
| 56          | M   | 38         | CP    | P210            | Gen 1 | N        | Y                     | N              |
| 58          | M   | 53         | CP    | P210            | Gen 1 | N        | Y                     | N              |
| 61          | M   | 63         | CP    | P210            | Gen 1 | N        | Y                     | N              |
| 62          | M   | 64         | CP    | P210            | Gen 1 | N        | Y                     | N              |
| 65          | M   | 55         | CP    | P210            | Gen 1 | N        | Y                     | N              |
| 66          | M   | 45         | CP    | P210            | Gen 1 | N        | N                     | N              |
| 68          | M   | 18         | CP    | P210            | Gen 1 | N        | N                     | N              |
| 70          | M   | 39         | CP    | P210            | Gen 1 | N        | N                     | N              |
| 71          | M   | 38         | CP    | P210            | Gen 1 | N        | N                     | N              |
| 72          | M   | 35         | CP    | P210            | Gen 1 | N        | N                     | N              |
| 73          | M   | 56         | CP    | P210            | Gen 1 | N        | N                     | N              |
| 74          | M   | 52         | CP    | P210            | Gen 1 | N        | N                     | N              |
| 75          | M   | 56         | CP    | P210            | Gen 1 | N        | N                     | N              |
| 77          | M   | 26         | CP    | P210            | Gen 1 | N        | N                     | N              |
| 78          | M   | 47         | CP    | P210            | Gen 1 | N        | N                     | N              |
| 83          | M   | 72         | CP    | P210            | Gen 1 | N        | N                     | N              |
| 85          | M   | 53         | BC    | P230            | Gen 1 | N        | N                     | N              |
| 86          | M   | 4          | CP    | P210            | Gen 1 | N        | N                     | N              |
| 87          | M   | 29         | CP    | P210            | Gen 1 | N        | N                     | N              |
| 88          | M   | 64         | CP    | P210            | Gen 1 | N        | N                     | N              |
| 89          | M   | 34         | CP    | P210            | Gen 1 | N        | N                     | N              |
| 91          | M   | 46         | CP    | P210            | Gen 1 | N        | N                     | N              |
| 92          | M   | 56         | CP    | P210            | Gen 1 | N        | N                     | N              |
| 95          | M   | 30         | CP    | P210            | Gen 1 | N        | N                     | N              |
| 96          | M   | 41         | CP    | P210            | Gen 1 | N        | N                     | N              |
| 100         | M   | 27         | CP    | P210            | Gen 1 | N        | N                     | N              |
| 101         | M   | 57         | CP    | P210            | Gen 1 | N        | N                     | N              |
| 103         | M   | 36         | BC    | P210            | Gen 1 | N        | N                     | N              |
| 104         | M   | 49         | CP    | P210            | Gen 1 | N        | N                     | N              |
| 105         | M   | 47         | CP    | P210            | Gen 1 | N        | N                     | N              |
| 107         | M   | 28         | CP    | P210            | Gen 1 | N        | N                     | N              |
| 109         | M   | 38         | CP    | P210            | Gen 1 | N        | N                     | N              |
| 110         | M   | 46         | CP    | P210            | Gen 1 | N        | N                     | N              |
| 113         | M   | 45         | CP    | P230            | Gen 2 | N        | N                     | N              |

Table SI. Continued.

| Patient no. | Sex | Age, years | Stage | Transcript type | TKI   | Mutation | Additional chromosome | T315I mutation |
|-------------|-----|------------|-------|-----------------|-------|----------|-----------------------|----------------|
| 114         | M   | 74         | CP    | P210            | Gen 1 | N        | N                     | N              |
| 115         | M   | 51         | CP    | P210            | Gen 1 | N        | N                     | N              |
| 116         | M   | 60         | AP    | P210            | Gen 2 | N        | N                     | N              |
| 118         | M   | ND         | CP    | P210            | Gen 1 | N        | N                     | N              |
| 120         | M   | 54         | AP    | P210            | Gen 2 | N        | N                     | N              |
| 122         | M   | 48         | CP    | P210            | Gen 1 | N        | N                     | N              |
| 125         | M   | 40         | CP    | P210            | Gen 2 | N        | N                     | N              |
| 127         | M   | 61         | CP    | P210            | Gen 1 | N        | N                     | N              |
| 130         | M   | 55         | CP    | P210            | Gen 1 | N        | N                     | N              |
| 131         | M   | 28         | CP    | P210            | Gen 1 | N        | N                     | N              |
| 135         | M   | 53         | CP    | P210            | Gen 1 | N        | N                     | N              |
| 137         | M   | 68         | CP    | P210            | Gen 1 | N        | N                     | N              |
| 139         | M   | 30         | CP    | P210            | Gen 1 | N        | N                     | N              |
| 141         | M   | ND         | CP    | P210            | Gen 1 | N        | N                     | N              |
| 142         | M   | 34         | CP    | P210            | Gen 1 | N        | N                     | N              |
| 144         | M   | 35         | CP    | P210            | Gen 1 | N        | N                     | N              |
| 146         | M   | 38         | CP    | P210            | Gen 1 | N        | N                     | N              |
| 149         | M   | 38         | CP    | P210            | Gen 1 | N        | N                     | N              |
| 150         | M   | 28         | CP    | P210            | Gen 1 | N        | N                     | N              |
| 152         | M   | 30         | CP    | P210            | Gen 1 | N        | N                     | N              |
| 153         | M   | 38         | CP    | P210            | Gen 1 | N        | N                     | N              |
| 154         | M   | 21         | CP    | P210            | Gen 1 | N        | N                     | N              |
| 157         | M   | 31         | CP    | P210            | Gen 1 | N        | N                     | N              |
| 158         | M   | ND         | CP    | P210            | Gen 1 | N        | N                     | N              |
| 162         | M   | ND         | CP    | P210            | Gen 1 | N        | N                     | N              |
| 165         | M   | 46         | CP    | P210            | Gen 1 | N        | N                     | N              |
| 166         | M   | 29         | CP    | P210            | Gen 1 | N        | N                     | N              |
| 167         | M   | 46         | CP    | P210            | Gen 1 | N        | N                     | N              |
| 168         | M   | 58         | CP    | P210            | Gen 1 | N        | N                     | N              |
| 170         | M   | 62         | CP    | P210            | Gen 1 | N        | N                     | N              |
| 171         | M   | 51         | CP    | P210            | Gen 1 | N        | N                     | N              |
| 172         | M   | 27         | CP    | P210            | Gen 1 | N        | N                     | N              |
| 174         | M   | 54         | CP    | P210            | Gen 1 | N        | N                     | N              |
| 3           | F   | 38         | CP    | P210            | Gen 1 | N        | N                     | N              |
| 4           | F   | 32         | CP    | P210            | Gen 1 | N        | N                     | N              |
| 7           | F   | 22         | CP    | P210            | Gen 1 | N        | N                     | N              |
| 11          | F   | 38         | CP    | P210            | Gen 1 | N        | N                     | N              |
| 12          | F   | 76         | CP    | P210            | Gen 1 | N        | N                     | N              |
| 17          | F   | 43         | CP    | P230            | Gen 1 | N        | N                     | N              |
| 18          | F   | 46         | CP    | P210            | Gen 1 | N        | N                     | N              |
| 19          | F   | 59         | CP    | P210            | Gen 1 | N        | N                     | N              |
| 21          | F   | 45         | CP    | P210            | Gen 2 | N        | N                     | N              |
| 27          | F   | 49         | CP    | P210            | Gen 1 | N        | N                     | N              |
| 30          | F   | 59         | CP    | P210            | Gen 1 | N        | N                     | N              |
| 32          | F   | 26         | CP    | P210            | Gen 1 | N        | N                     | N              |
| 34          | F   | 69         | CP    | P210            | Gen 1 | N        | N                     | N              |
| 35          | F   | 54         | CP    | P210            | Gen 1 | N        | N                     | N              |
| 36          | F   | 51         | CP    | P210            | Gen 1 | N        | N                     | N              |
| 38          | F   | 42         | CP    | P210            | Gen 1 | N        | N                     | N              |
| 39          | F   | 45         | CP    | P210            | Gen 1 | N        | N                     | N              |
| 47          | F   | 59         | CP    | P210            | Gen 1 | N        | N                     | N              |
| 49          | F   | 16         | CP    | P210            | Gen 1 | N        | N                     | N              |
| 52          | F   | 29         | CP    | P210            | Gen 1 | N        | N                     | N              |
| 57          | F   | 45         | CP    | P210            | Gen 1 | N        | N                     | N              |
| 59          | F   | 17         | CP    | P210            | Gen 1 | N        | N                     | N              |
| 60          | F   | 54         | AP    | P210            | Gen 2 | N        | N                     | N              |

Table SI. Continued.

| Patient no. | Sex | Age, years | Stage | Transcript type | TKI   | Mutation | Additional chromosome | T315I mutation |
|-------------|-----|------------|-------|-----------------|-------|----------|-----------------------|----------------|
| 63          | F   | 27         | CP    | P210            | Gen 1 | N        | N                     | N              |
| 64          | F   | 47         | BC    | P210            | Gen 1 | N        | N                     | N              |
| 76          | F   | 56         | CP    | P210            | Gen 1 | N        | N                     | N              |
| 84          | F   | 40         | CP    | P210            | Gen 1 | N        | N                     | N              |
| 155         | F   | 39         | CP    | P210            | Gen 1 | N        | N                     | N              |
| 156         | F   | 36         | CP    | P210            | Gen 1 | N        | N                     | N              |
| 159         | F   | 48         | CP    | P210            | Gen 1 | N        | N                     | N              |
| 173         | F   | 48         | CP    | P210            | Gen 1 | N        | N                     | N              |
| 175         | F   | 55         | CP    | P210            | Gen 2 | N        | N                     | N              |
| 5           | M   | 63         | CP    | P210            | Gen 1 | Y        | Y                     | N              |
| 16          | M   | 31         | CP    | P210            | Gen 1 | Y        | Y                     | Y              |
| 29          | M   | 49         | CP    | P210            | Gen 1 | Y        | Y                     | N              |
| 31          | M   | 25         | CP    | P210            | Gen 2 | Y        | Y                     | N              |
| 40          | M   | 38         | CP    | P210            | Gen 1 | Y        | Y                     | N              |
| 42          | M   | 31         | CP    | P210            | Gen 1 | Y        | Y                     | N              |
| 53          | M   | 41         | CP    | P210            | Gen 1 | Y        | Y                     | Y              |
| 69          | M   | 71         | CP    | P210            | Gen 1 | Y        | Y                     | N              |
| 81          | M   | 46         | CP    | P210            | Gen 1 | Y        | Y                     | Y              |
| 82          | M   | 67         | CP    | P210            | Gen 1 | Y        | Y                     | Y              |
| 90          | M   | 61         | CP    | P210            | Gen 1 | Y        | Y                     | Y              |
| 94          | M   | 54         | CP    | P210            | Gen 1 | Y        | Y                     | Y              |
| 98          | M   | 34         | CP    | P210            | Gen 1 | Y        | N                     | N              |
| 99          | M   | 26         | BC    | P230            | Gen 2 | Y        | N                     | N              |
| 123         | M   | 43         | CP    | P210            | Gen 1 | Y        | N                     | Y              |
| 128         | M   | 53         | CP    | P210            | Gen 1 | Y        | N                     | N              |
| 132         | M   | 39         | CP    | P210            | Gen 1 | Y        | N                     | N              |
| 148         | M   | 18         | CP    | P210            | Gen 1 | Y        | N                     | N              |
| 151         | M   | 38         | CP    | P210            | Gen 1 | Y        | N                     | Y              |
| 160         | M   | ND         | CP    | P210            | Gen 1 | Y        | N                     | N              |
| 163         | M   | 58         | CP    | P210            | Gen 1 | Y        | N                     | Y              |
| 169         | M   | 41         | CP    | P210            | Gen 1 | Y        | N                     | Y              |
| 10          | F   | 51         | CP    | P210            | Gen 1 | Y        | N                     | N              |
| 14          | F   | 67         | CP    | P210            | Gen 1 | Y        | N                     | Y              |
| 15          | F   | 57         | BC    | P210            | Gen 1 | Y        | N                     | N              |
| 22          | F   | 36         | CP    | P210            | Gen 1 | Y        | N                     | N              |
| 48          | F   | 65         | BC    | P230            | Gen 1 | Y        | N                     | N              |
| 54          | F   | 37         | CP    | P210            | Gen 1 | Y        | N                     | N              |
| 67          | F   | 54         | CP    | P210            | Gen 1 | Y        | N                     | Y              |
| 79          | F   | 52         | CP    | P210            | Gen 1 | Y        | N                     | N              |
| 80          | F   | 23         | BC    | P210            | Gen 1 | Y        | N                     | Y              |
| 93          | F   | 24         | CP    | P210            | Gen 1 | Y        | N                     | N              |
| 97          | F   | 71         | CP    | P210            | Gen 1 | Y        | N                     | N              |
| 102         | F   | 30         | AP    | P230            | Gen 1 | Y        | N                     | N              |
| 106         | F   | 28         | CP    | P210            | Gen 1 | Y        | N                     | N              |
| 108         | F   | 63         | CP    | P210            | Gen 1 | Y        | N                     | N              |
| 111         | F   | 26         | CP    | P210            | Gen 1 | Y        | N                     | N              |
| 112         | F   | 46         | CP    | P210            | Gen 1 | Y        | N                     | N              |
| 117         | F   | 70         | CP    | P210            | Gen 1 | Y        | N                     | N              |
| 119         | F   | 45         | CP    | P210            | Gen 1 | Y        | N                     | Y              |
| 121         | F   | 52         | CP    | P210            | Gen 1 | Y        | N                     | N              |
| 124         | F   | 25         | CP    | P210            | Gen 1 | Y        | N                     | N              |
| 126         | F   | 46         | CP    | P210            | Gen 1 | Y        | N                     | Y              |
| 129         | F   | 48         | CP    | P210            | Gen 1 | Y        | N                     | N              |
| 133         | F   | 47         | CP    | P210            | Gen 1 | Y        | N                     | N              |
| 134         | F   | 46         | CP    | P210            | Gen 1 | Y        | N                     | N              |
| 136         | F   | 44         | CP    | P210            | Gen 1 | Y        | N                     | N              |

Table SI. Continued.

| Patient no. | Sex | Age, years | Stage | Transcript type | TKI   | Mutation | Additional chromosome | T315I mutation |
|-------------|-----|------------|-------|-----------------|-------|----------|-----------------------|----------------|
| 138         | F   | 27         | CP    | P210            | Gen 1 | Y        | N                     | N              |
| 140         | F   | 3          | CP    | P210            | Gen 1 | Y        | N                     | N              |
| 143         | F   | 51         | BC    | P210            | Gen 1 | Y        | N                     | N              |
| 145         | F   | 52         | CP    | P230            | Gen 1 | Y        | N                     | N              |
| 147         | F   | 38         | CP    | P210            | Gen 1 | Y        | N                     | N              |
| 161         | F   | ND         | CP    | P210            | Gen 2 | Y        | N                     | N              |
| 164         | F   | 68         | CP    | P210            | Gen 1 | Y        | N                     | N              |

M, male; F, female; ND, no data available; CP, chronic phase; AP, accelerated phase; BC, blast crisis; P210, M-type b3a2 (e14a2), b2a2 (e13a2); P230,  $\mu$ -type e19a2; Gen, generation; Y, yes; N, no; TKI, tyrosine kinase inhibitor.
